# Supplementary material for: Enhancing the device efficiency by filling the traps in photoanodes
Source: Royal Society of Chemistry journal article supplement (doi:10.1039/c9tc04740a), 2019-01-01
Supplement: c9tc04740a1.pdf [file c9tc04740a1.pdf]

## Supporting Information

### Enhancing the device efficiency by filling the traps in photoanode

*Vediappan Sudhakar and Kothandam Krishnamoorthy\**

### Experimental Section

#### Dye sensitized solar cell fabrication

Commercial Fluorine-doped tin oxide glass (FTO) (TEC-15, 2.2 mm thickness, Solaronix) has been used as transparent conducting electrode, which is cleaned in an ultrasonic bath with detergent, acetone and iso- propyl alcohol (each step resulted for 20 min long). The FTO substrate were immersed into a 40 mM aqueous  $\text{TiCl}_4$  solution at 70 °C for 30 min and washed with plenty of water and ethanol. later, FTO substrates were sintered at 500°C for 30 min. Subsequently, 7-8  $\mu\text{m}$  thick layer of  $\text{TiO}_2$  (Ti-Nanoxide T/SP, Solaronix) with an average particle size of 20 nm was deposited on top of FTO substrate. Then the  $\text{TiO}_2$  coated FTO substrate were sintered by gradual heating under air flow at 325°C for 5 min, at 375°C for 5 min, at 450 °C for 15 min, and 500 °C for 15 min. Then, 3-4  $\mu\text{m}$  thick scattering layer (particle size ~400 nm) were deposited over the 20 nm  $\text{TiO}_2$  particles. Then, FTO substrate were sintered at gradually under air flow at 325°C for 5 min, at 375°C for 5 min, at 450 °C for 15 min, and 500 °C for 15 min. After that,  $\text{TiO}_2$  coated substrate FTO plates were immersed into a 40 mM aqueous  $\text{TiCl}_4$  solution at 70°C for 30 min and washed with copious amount of water and ethanol, the FTO substrate were sintered at 500 °C for 30min. After cooling to 80 °C,  $\text{TiO}_2$  coated FTO substrate were then immersed in a 0.5 mM of N719 dye in of Acetonitrile / t-butanol mixture (volume ratio: 1/1) for 22 h. After anchoring the dye, photoanodes were washed with Acetonitrile / t-butanol (volume ratio: 1/1) solution and dried by air flow. Finally, the electrolyte (AN-50,

Solarnix, Switzerland) solution was introduced into the space between sandwiched photo anodes and Pt coated FTO that was used as a counter electrode.

### **Hydrazine treatment (Trap filling)**

TiO<sub>2</sub> coated FTO substrates were immersed into 100 ml DI water which contains 1.5 mL hydrazine solution. These photoanodes, namely N<sub>10-70</sub>, N<sub>20-70</sub>, N<sub>30-70</sub> and N<sub>40-70</sub>, were treated at 70 °C at different time intervals such as 10, 20, 30 and 40 minutes respectively. Subsequently, the devices were heated for 30 more minutes at 70 °C to remove the excess of hydrazine from the photoanode. Furthermore, other set of photoanodes of N<sub>10-70</sub>, N<sub>20-70</sub>, N<sub>30-70</sub> and N<sub>40-70</sub> were sintered at 500°C for different time intervals such as 10, 20, 30 and 40 minutes and named as N<sub>10-500</sub>, N<sub>20-500</sub>, N<sub>30-500</sub> and N<sub>40-500</sub>.

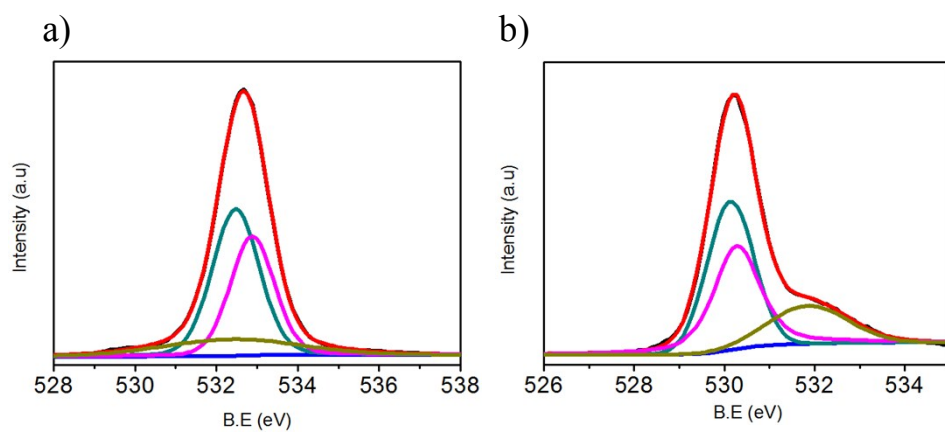

**Figure S1.** XPS spectra of a)  $N_{0-0}$  and b)  $N_{30-70}$  O 1s peak

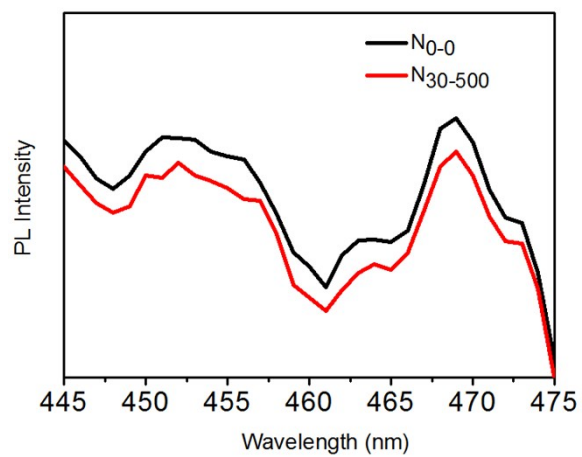

**Figure S2.** Photoluminescence (PL) curves of the  $N_{0-0}$  and  $N_{30-500}$

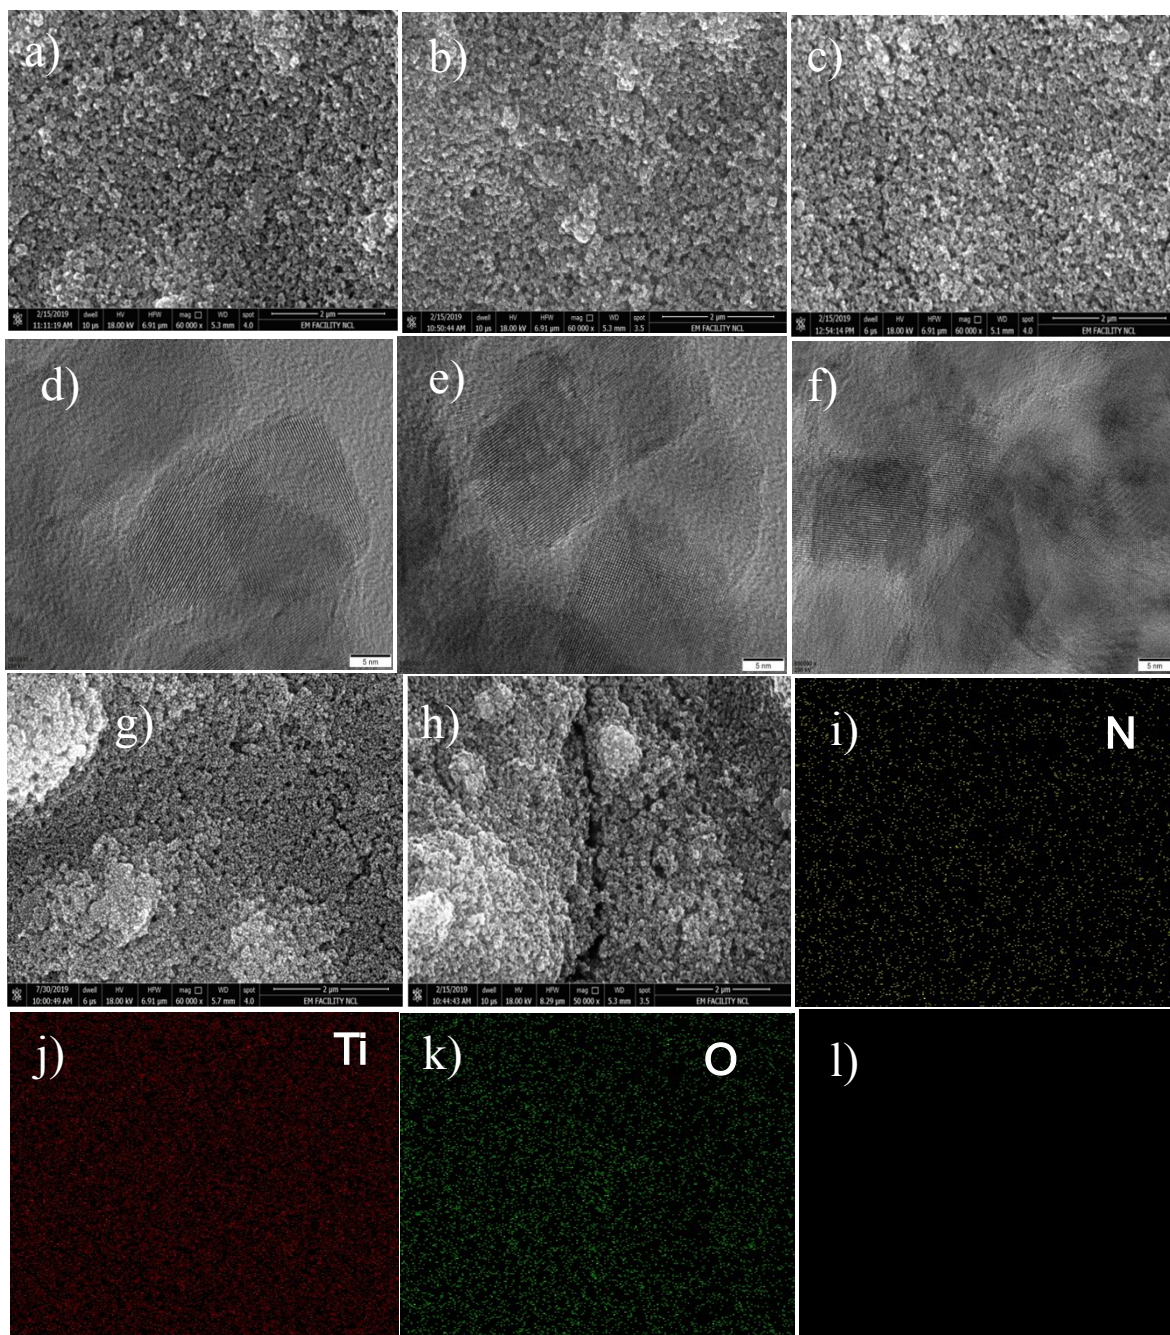

**Figure S3.** SEM top view image of a)  $N_{0-0}$  b)  $N_{30-70}$  c)  $N_{30-500}$ . HRTEM images of d)  $N_{0-0}$  e)  $N_{30-70}$  f)  $N_{30-500}$ , SEM images of g)  $N_{40-70}$  h)  $N_{40-500}$  and their elemental mapping results i) N (Yellow) j) Ti (Red) k) O (Green) l) Absence of N in  $N_{0-0}$

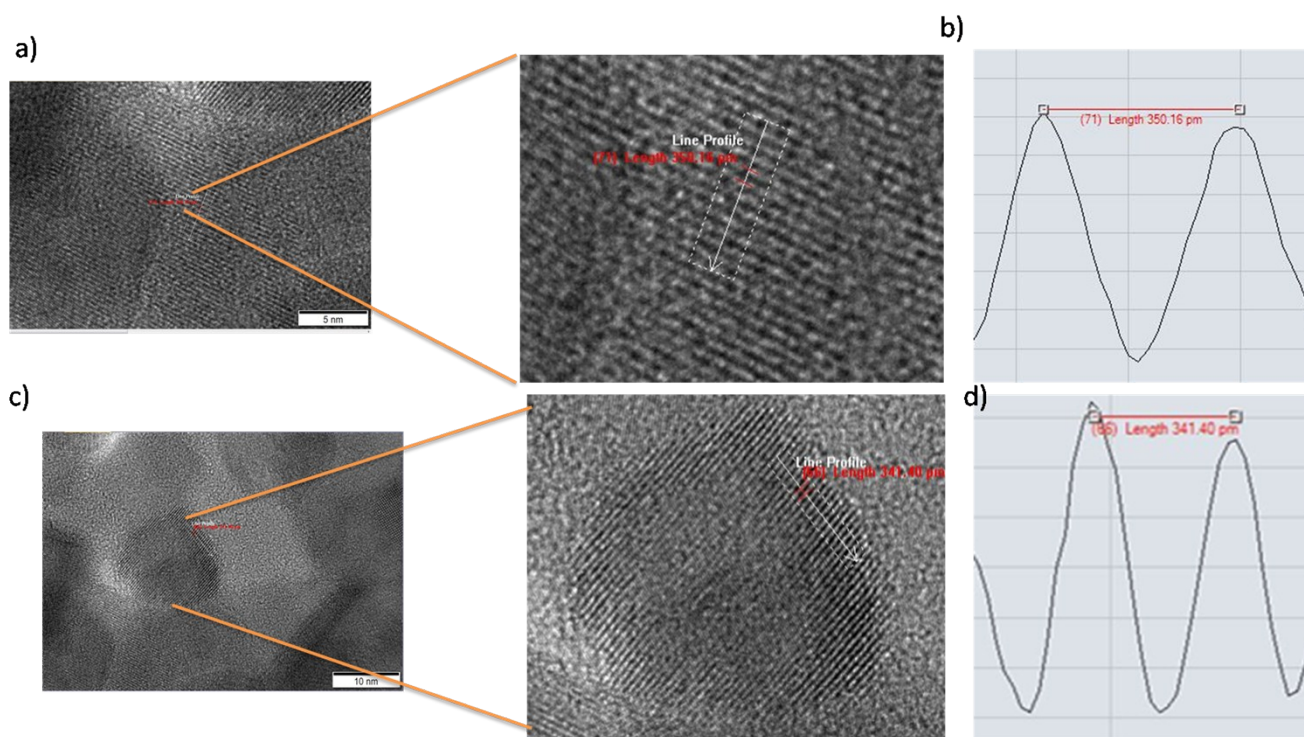

**Figure S4.** HRTEM images of  $N_{0-0}$  (a) Interplanar space value of  $N_{0-0}$  (b) HRTEM images of  $N_{30-500}$  (c) Interplanar space value of  $N_{30-500}$  (d)



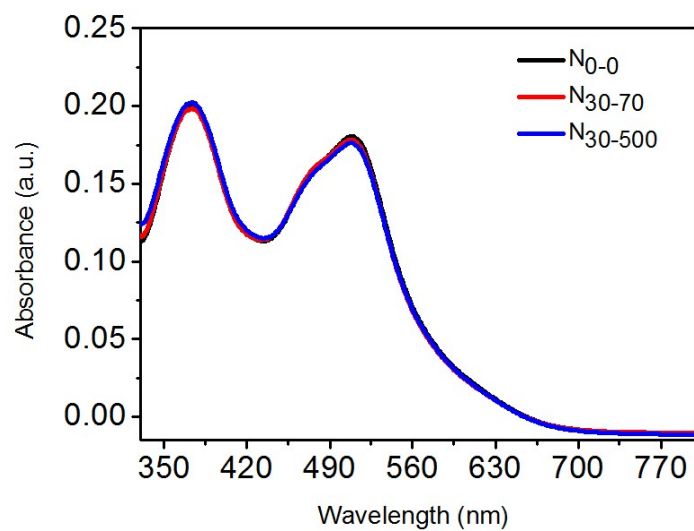

**Figure S5.** Dye desorption study of  $N_{0-0}$ ,  $N_{30-70}$  and  $N_{30-500}$

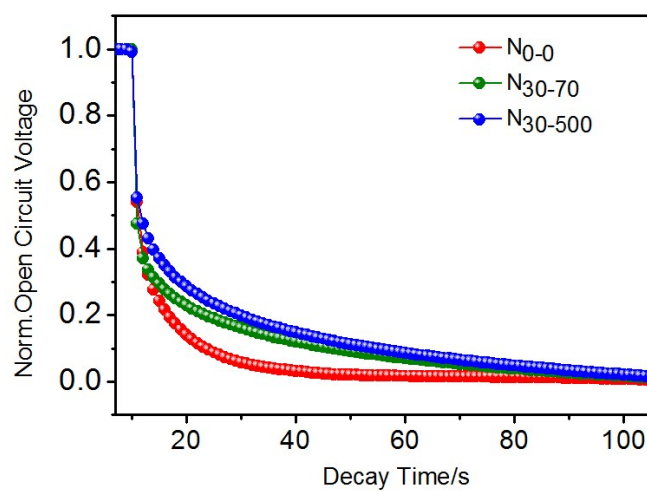

**Figure S6.** Open-circuit voltage-decay (OCVD) of  $N_{0-0}$ ,  $N_{30-70}$  and  $N_{30-500}$

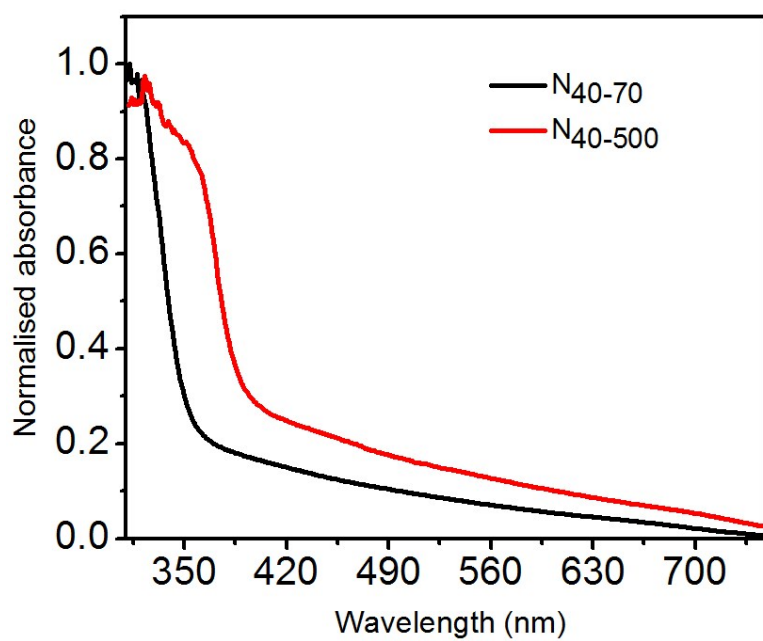

**Figure S7.** UV-vis spectra of  $N_{40-70}$  and  $N_{40-500}$

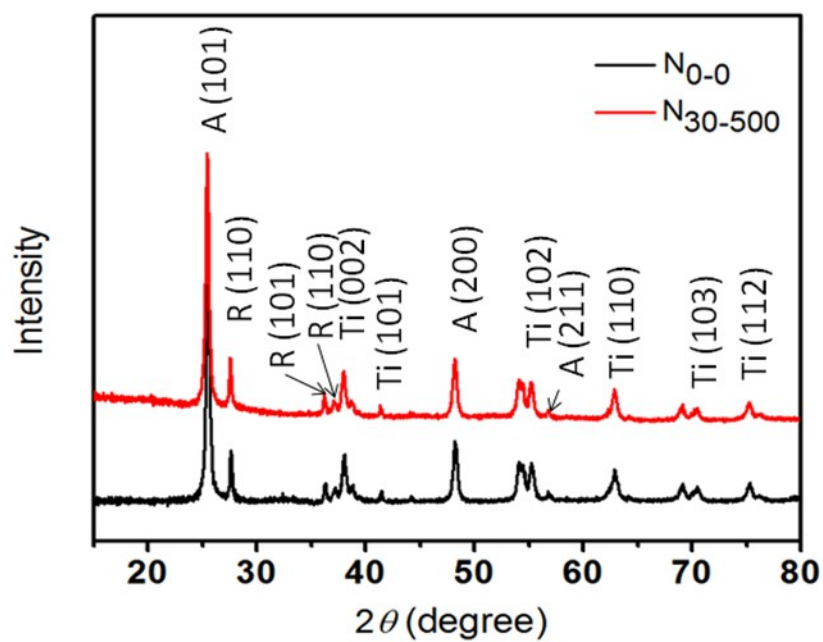

**Figure S8.** XRD patterns of  $N_{0-0}$  and  $N_{30-500}$

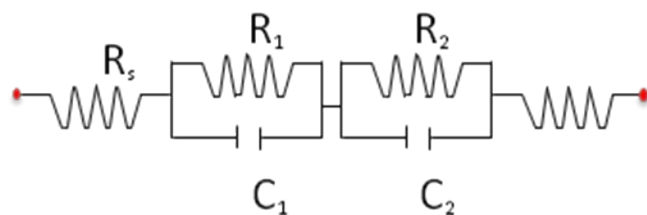

**Figure S9.** Equivalent circuit used to fit EIS curves

**Table S1.** Photovoltaic parameters of DSSCs with N<sub>0-0</sub>, N<sub>30-70</sub> and N<sub>30-500</sub> measured under 1 sun illumination condition (AM 1.5 G, 100 mW cm<sup>-2</sup>). Active area of the DSSCs (18.75 cm<sup>2</sup>).

| Sample              | $V_{oc}$<br>(V)   | $J_{sc}$<br>(mA cm <sup>-2</sup> ) | $^{INT}J_{sc}$<br>(mA cm <sup>-2</sup> ) | $FF$<br>(%)    | $\eta$<br>(%)   |
|---------------------|-------------------|------------------------------------|------------------------------------------|----------------|-----------------|
| N <sub>0-0</sub>    | $0.705 \pm 0.003$ | $12.52 \pm 0.11$                   | 10.1                                     | $62.1 \pm 0.1$ | $5.48 \pm 0.15$ |
| N <sub>30-70</sub>  | $0.721 \pm 0.002$ | $13.31 \pm 0.12$                   | 11.3                                     | $71.0 \pm 0.2$ | $6.81 \pm 0.16$ |
| N <sub>30-500</sub> | $0.737 \pm 0.002$ | $14.77 \pm 0.14$                   | 13.2                                     | $73.0 \pm 0.2$ | $7.94 \pm 0.13$ |

**Table S2.** EIS Parameters of N<sub>0-0</sub> and hydrazine treated TiO<sub>2</sub> based large area (18.75 cm<sup>2</sup>) DSSCs at an applied voltage of 0.5 V in the dark condition.

| Sample              | $R_{rec}$ ( $\Omega$ ) | $C_{\mu}$ (F/cm <sup>2</sup> ) | $\tau$ (ms) |
|---------------------|------------------------|--------------------------------|-------------|
| N <sub>0-0</sub>    | 9                      | $1.2 \times 10^{-4}$           | 1.1         |
| N <sub>30-70</sub>  | 12                     | $1.11 \times 10^{-3}$          | 13.2        |
| N <sub>30-500</sub> | 20                     | $1.6 \times 10^{-3}$           | 32          |
